# Supplementary material for: Exploring the Effect of Misinformation on Infectious Disease Transmission
Source: MDPI journal article supplement (doi:10.3390/systems10020050), 2022-04-15
Supplement: s1 [file s1]

# **Exploring the Effect of Misinformation on Infectious Disease Transmission**

## Supplementary Material

A simple SI model example is presented to illustrate the LTM method and behavioural analysis of the model. Figure S1 presents the SI model, which runs from  $T_1$  (time) to  $T_{20}$  (time). In the model, the  $N$  (total population) size is 10000 people with 9999 initial  $S$  (susceptible) and 1 initial  $I$  (infected). The SI model's basic flow and auxiliaries— $R_0$  (reproduction number),  $D$  (delay duration),  $\beta$  (per capita contact),  $\lambda$  (force of infection), and  $IR$  (infection rate)—are shown in Equations (1–8).

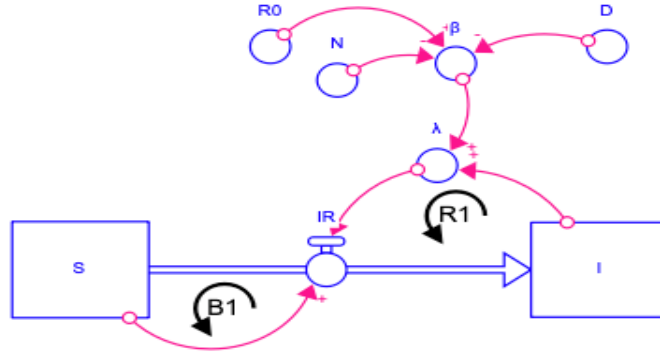

**Figure S1. SI model structure.**

$$\begin{aligned} \frac{d(S(t))/dt}{} &= -\lambda * S(t) & (1) \\ \frac{d(I(t))/dt}{} &= \lambda * S(t) & (2) \\ N \text{ (total population)} &= 10000 & (3) \\ R_0 \text{ (reproduction number)} &= 2 & (4) \\ D \text{ (delay duration)} &= 2 & (5) \\ \beta \text{ (per capita contact)} &= R_0 / (N * D) & (6) \\ \lambda \text{ (force of infection)} &= \beta * I(t) & (7) \\ IR \text{ (infection rate)} &= S(t) * \lambda & (8) \end{aligned}$$

The model contains two feedback loops:  $R_1$  reinforcing feedback loop and  $B_1$  balancing feedback loop, with the point of inflection (POI) between time  $T_{13}$  and  $T_{14}$ . Table S1 presents the details of  $R_1$  and  $B_1$  loop variables and links.

**Table S1. Details of  $R_1$  and  $B_1$  loops.**

| <b><math>B_1</math> Balancing Feedback Loop</b> |                       | <b><math>R_1</math> Reinforcing Feedback Loop</b> |                             |
|-------------------------------------------------|-----------------------|---------------------------------------------------|-----------------------------|
| Number of Variables                             | Number of Links       | Number of Variables                               | Number of Links             |
| 1. $S$                                          | 1. $S \rightarrow IR$ | 1. $I$                                            | 1. $\lambda \rightarrow IR$ |
| 2. $IR$                                         | 2. $IR \rightarrow S$ | 2. $\lambda$                                      | 2. $IR \rightarrow I$       |
|                                                 |                       | 3. $IR$                                           | 3. $I \rightarrow \lambda$  |

The LTM method makes computations as time progresses in the model, and the first computation

starts when the model is initialised. The following Equations (1–4) are used to calculate the link scores without integration, link scores with integration, loop scores, and relative loop scores, respectively [46, 47].

$$LS(S \rightarrow IR) = \{ (|\Delta_S IR / \Delta IR| \cdot \text{sign}(\Delta_S IR / \Delta S)) , 0, \Delta IR = 0 \text{ or } \Delta S = 0 \} \quad 1$$

$$\text{Inflow: } LS(i \rightarrow S) = (|\Delta i / \Delta S_{t-\Delta t}| * 1) \quad \text{Outflow: } LS(o \rightarrow S) = (|\Delta o / \Delta S_{t-\Delta t}| * -1) \quad 2$$

$$\text{Loop Score}(L_S) = (LS(u_1 \rightarrow v_1) \cdot LS(u_1 \rightarrow v_1) \dots LS(u_n \rightarrow v_n)) \quad 3$$

$$\text{Relative Loop Score } L_S = (\text{Loop Score}(L_S) / \sum_{\lambda=0}^n |\text{Loop Score}(L_\lambda)|) \quad 4$$

The abovementioned Equation (1) calculates the link score (without integration). In the SI model, links without the integration process are “S→IR”, “λ→IR”, and “I→λ”. Table S2 includes all the necessary steps to calculate links’ scores for T<sub>2</sub>. In the link “S→IR”, IR is a flow defined by the equation IR=f(S\*λ). The first term in Equation (1), “|Δ<sub>S</sub>IR/ΔIR|”, measures the contribution of S to IR by reporting the proportion of the change in IR that originated from S, where the partial change in IR occurred. To calculate the link score magnitude for the link “S→IR”, first, determine “ΔIR”, which is the actual change in IR (0.9996). Next, determine the partial change in IR for S over the interval, represented with the symbol “Δ<sub>S</sub>IR”, by substituting the previous value of λ (0.0001) and the current value of S (9998) into the equation for IR. Then, take the computed value of IR using those values (0.9998) and subtract from it the previous value of IR (0.9999) to yield “Δ<sub>S</sub>IR” (-0.0001). To complete the calculation of the link score magnitude, divide “Δ<sub>S</sub>IR” (-0.0001) by “ΔIR” (0.9996) to obtain the result (0.0001) of the change in IR, which is caused by the change in S. The second term in Equation (1), “sign(Δ<sub>S</sub>IR/ΔS)”, measures link polarity. The sign function extracts the sign for the link. To complete the link score calculation, multiply link score magnitude by link polarity. Repeat the same steps for other link scores, “λ→IR” and “I→λ”.

**Table S2. Demonstration of link scores for S→IR, λ→IR, and I→λ by using Equation (1). Calculations are based on the following equations: IR = S\*λ and λ = I\*β.**

| Variable Link | Time T <sub>1</sub> | Time T <sub>2</sub> | Variable Change | Partial Change IR              | Link Score Magnitude               | Link Polarity                      | Link Score                                                               |
|---------------|---------------------|---------------------|-----------------|--------------------------------|------------------------------------|------------------------------------|--------------------------------------------------------------------------|
| S<br>S→IR     | 9999                | 9998                | ΔS<br>= -1      | Δ <sub>S</sub> IR<br>= -0.0001 | Δ <sub>S</sub> IR/ΔIR <br>= 0.0001 | sign(Δ <sub>S</sub> IR/ΔS)<br>= +1 | Δ <sub>S</sub> IR/ΔIR .<br>sign(Δ <sub>S</sub> IR/ΔS)<br>= <b>0.0001</b> |
| λ<br>λ→IR     | 0.0001              | 0.0002              | Δλ<br>= 0.0001  | Δ <sub>λ</sub> IR<br>= 0.9999  | Δ <sub>λ</sub> IR/ΔIR <br>= 1.0003 | sign(Δ <sub>λ</sub> IR/Δλ)<br>= +1 | Δ <sub>λ</sub> IR/ΔIR .<br>sign(Δ <sub>λ</sub> IR/Δλ)<br>= <b>1.0003</b> |
| IR= S*λ       | 0.9999              | 1.9995              | ΔIR<br>= 0.9996 |                                |                                    |                                    |                                                                          |
| I<br>I→λ      | 1                   | 2                   | ΔI<br>= 1       | Δ <sub>I</sub> λ<br>= 0.0001   | Δ <sub>I</sub> λ/Δλ <br>= 1        | sign(Δ <sub>I</sub> λ/Δλ)<br>= +1  | Δ <sub>I</sub> λ/Δλ .<br>sign(Δ <sub>I</sub> λ/Δλ)<br>= <b>1</b>         |
| β             | 0.0001              | 0.0001              |                 |                                |                                    |                                    |                                                                          |
| λ= β*I        | 0.0001              | 0.0002              | Δλ<br>= 0.0001  |                                |                                    |                                    |                                                                          |

The abovementioned Equation (2) calculates the link score with integration, where “i” is the inflow, “o” is the outflow, “S” is the stock, and “t” represents time. “ $\Delta i$ ” and “ $\Delta o$ ” represent the first-order partial changes in stock S for the flow. “ $\Delta S_t - \Delta S_{t-dt}$ ” is the change in the net flow, which is the second-order change in stock S. The terms “ $|\Delta i / \Delta S_t - \Delta S_{t-dt}|$ ” and “ $|\Delta o / \Delta S_t - \Delta S_{t-dt}|$ ” measure the contribution of flow to the stock by reporting the proportion of the change in the stock. To complete the calculation, multiply the inflow result by “1” and multiply the outflow result by “-1”. In the SI model, the links that contain the integration process are “IR→S” and “IR→I”. Table S3 includes all the necessary steps to calculate the link scores for T<sub>2</sub>.

**Table S3. Demonstration of link scores for IR→S and IR→I by using Equation (2).**

| Variable Link                                         | Time T <sub>1</sub> | Time T <sub>2</sub> | Variable Change                         | Link Score Magnitude                                  |
|-------------------------------------------------------|---------------------|---------------------|-----------------------------------------|-------------------------------------------------------|
| i = non                                               | 0                   | 0                   | $\Delta i = 0$                          | $ \Delta i / \Delta S_t - \Delta S_{t-dt}  * 1 = 0$   |
| o = IR<br>IR→S                                        | 0.9999              | 1.9995              | $\Delta o = 0.9996$                     | $ \Delta o / \Delta S_t - \Delta S_{t-dt}  * -1 = -1$ |
| $S = \int (\text{in} - \text{out})$<br>Initial = 9999 | 9999                | 9998                | $\Delta S_t - \Delta S_{t-dt} = 0.9996$ |                                                       |
| i = IR<br>IR→I                                        | 0.9999              | 1.9995              | $\Delta i = 0.9996$                     | $ \Delta i / \Delta I_t - \Delta I_{t-dt}  * 1 = 1$   |
| o = non<br>IR→I                                       | 0                   | 0                   | $\Delta o = 0$                          | $ \Delta o / \Delta I_t - \Delta I_{t-dt}  * -1 = 0$  |
| $I = \int (\text{in} - \text{out})$<br>Initial = 1    | 1                   | 2                   | $\Delta I_t - \Delta I_{t-dt} = 0.9996$ |                                                       |

Equations (1) and (2) both have the same concept to calculate the partial change, i.e.,  $\Delta i$  and  $\Delta o$  are the same concepts as  $\Delta IR$  or  $\Delta \lambda$ , and sign () is replaced with “-1” or “+1”. In the SI model, both S and I stocks have a single flow. “IR→S” and “IR→I” link scores are nonzero; therefore, the links between the flow and the stock are active. The S and I stocks will change throughout the simulation. Table S4 contains B<sub>1</sub> and R<sub>1</sub> loop scores, as well as relative loop scores for T<sub>2</sub>, T<sub>8</sub>, T<sub>10</sub>, T<sub>13</sub>, T<sub>14</sub>, T<sub>16</sub>, and T<sub>20</sub>.

**Table S4. Demonstration of loop scores and relative loop scores for B<sub>1</sub> and R<sub>1</sub>.**

| Links                    | T <sub>2</sub> | T <sub>8</sub> | T <sub>10</sub> | T <sub>13</sub> | T <sub>14</sub> | T <sub>16</sub> | T <sub>20</sub>       |
|--------------------------|----------------|----------------|-----------------|-----------------|-----------------|-----------------|-----------------------|
| S→IR                     | 0.0001         | 0.0129         | 0.0539          | 0.7020          | 5.3429          | 1.2529          | 1.000                 |
| IR→S                     | -1.000         | -1.000         | -1.000          | -1.000          | -1.000          | -1.000          | -1.000                |
| B1 Loop Score            | -0.0001        | -0.0129        | -0.0539         | -0.7020         | -5.3429         | -1.2529         | -1.000                |
| B1 Relative Loop Score   | -0.0099        | -1.2719        | -4.9913         | -33.609         | -55.9233        | -96.2257        | -100                  |
| $\lambda \rightarrow IR$ | 1.0003         | 1.0065         | 1.0273          | 1.3868          | 4.2110          | 0.0491          | 1.695e <sup>-23</sup> |
| IR→I                     | 1.000          | 1.000          | 1.000           | 1.000           | 1.000           | 1.000           | 1.000                 |
| I→ $\lambda$             | 1.000          | 1.000          | 1.000           | 1.000           | 1.000           | 1.001           | 1.000                 |

|                               |                |                |                |                |                |               |                             |
|-------------------------------|----------------|----------------|----------------|----------------|----------------|---------------|-----------------------------|
| <b>R1 Loop Score</b>          | <b>1.0003</b>  | <b>1.0065</b>  | <b>1.0273</b>  | <b>1.3868</b>  | <b>4.2110</b>  | <b>0.0491</b> | <b>1.695e<sup>-23</sup></b> |
| <b>R1 Relative Loop Score</b> | <b>99.9900</b> | <b>98.7476</b> | <b>95.0280</b> | <b>66.3902</b> | <b>44.0766</b> | <b>3.7742</b> | <b>1.695e<sup>-21</sup></b> |

Link scores can be multiplied together along a path and maintain the interpretation of the impact of the starting variable on the ultimate target. When that target is the variable itself, as it will be for a feedback loop, the score along that path, created by multiplying all of the link scores, is called the loop score [45]. Equation (3) calculates the loop score by multiplying all link scores in a loop from the first one,  $u_1 \rightarrow v_1$  to the last,  $u_n \rightarrow v_n$ , where “n” is the number of links in the loop “L<sub>s</sub>”. Therefore,  $v_n$  is the same as  $u_1$ . An odd number of negative links gives a negative loop, and an even number gives a positive loop. Equation (4) relativises or normalises the loop scores to obtain percentages. To normalise the loop scores, divide the loop score by the sum of the loop scores of all loops in the cycle partition [46]. The sign of a relative loop score represents the polarity of the feedback loop. The sign for the R<sub>1</sub> loop is positive, and the B<sub>1</sub> loop is negative. By comparing relative loop scores, we determine which loops contribute the most to the behaviour [46].

Figures S2 and S3 show the LTM simulation for R<sub>1</sub> and B<sub>1</sub> loops during the runs from T<sub>1</sub> to T<sub>20</sub>, and the model’s dt (time step) is 1. The line plot shows that the relative loop scores change throughout the simulation. The R<sub>1</sub> relative loop score is positive, and the B<sub>1</sub> relative loop score is negative. The stacked area plot dimensions are divided from 0% to 100%, with 50% considered a point of the loop's equilibrium (balance). The R<sub>1</sub> loop in red colour covers around an average relative loop score of 66%, and the B<sub>1</sub> loop in blue colour covers around an average relative loop score of 33% during the selected runs from Time T<sub>1</sub> to T<sub>20</sub>.

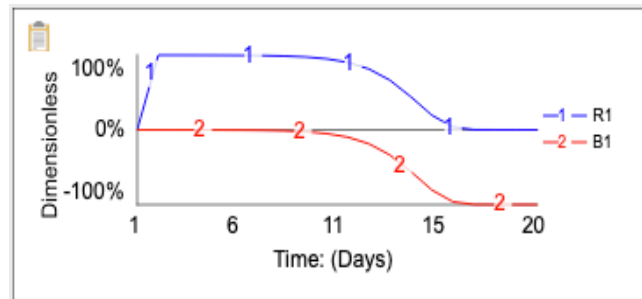

**Figure S2.** Relative scores of R<sub>1</sub> and B<sub>1</sub> loops in line plot.

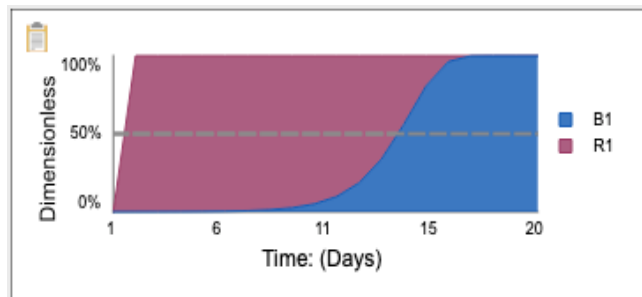

**Figure S3.** Relative scores of R<sub>1</sub> and B<sub>1</sub> loops in stacked-area plot.

The POI is easily detectable from the relative loop scores between the two loops. Figure S4 illustrates that the relative loop scores change throughout the simulation. At Time  $T_2$ , the  $R_1$  relative loop score is nearly 99.9%, and the  $B_1$  relative loop score is very low, i.e., about -0.01%. Then, the two loops shift in dominance, or inflection occurs between time  $T_{13}$  and  $T_{14}$ , as we calculated, shown in the above Table S4. At the end of the simulation, the  $R_1$  relative loop score is less than 0.001%, and the  $B_1$  relative loop score is close to -100%. The following plot illustrates that the selected run time,  $T_1$  to  $T_{20}$ , completely covers the behaviour of both the stocks and the loops.

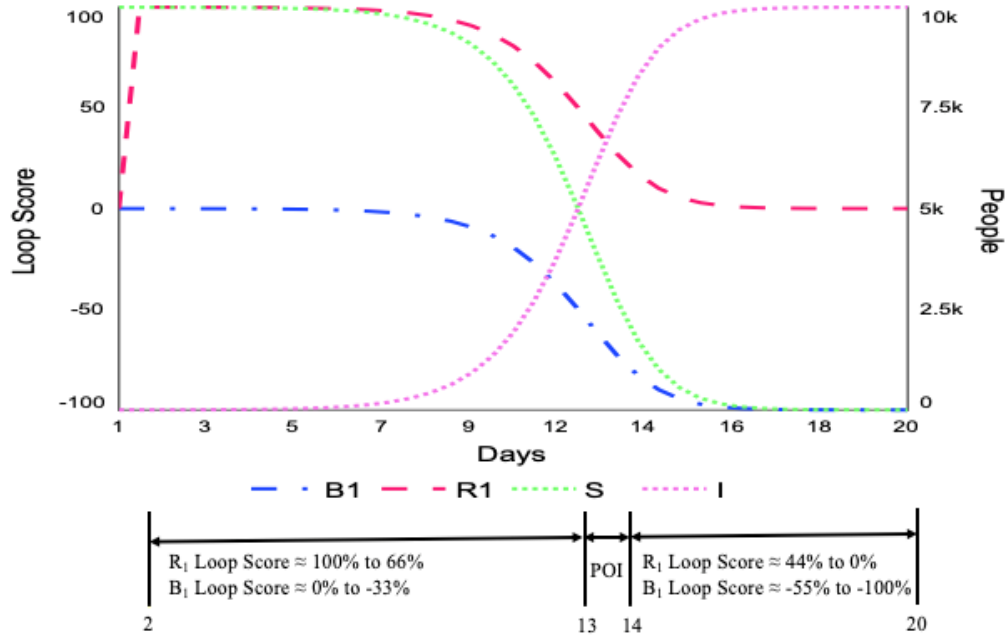

**Figure S4.** The  $R_1$  and  $B_1$  relative loop scores against  $S$  and  $I$  stocks.

The analysis of the relative loop scores at a particular point in time identifies the loops that dominate the model behaviour [46]. The above Figure S4 shows that the relative loop score magnitude for both  $R_1$  and  $B_1$  loops passes through the threshold for dominance at the point of inflection between  $T_{13}$  and  $T_{14}$ . The LTM analysis of the SI model identifies the specific links “ $S \rightarrow IR$ ” and “ $\lambda \rightarrow IR$ ” in  $B_1$  and  $R_1$  loops that explain the shifts in the feedback loop dominance between  $T_{13}$  and  $T_{14}$ . The “ $S \rightarrow IR$ ” and “ $\lambda \rightarrow IR$ ” link scores are the magnitude of  $R_1$  and  $B_1$  loops because  $IR$  is the only variable in  $R_1$  and  $B_1$  loops, which is dependent upon two dynamic variables:  $S$  and  $\lambda$ . The remaining “ $IR \rightarrow S$ ”, “ $IR \rightarrow I$ ”, and “ $I \rightarrow \lambda$ ” link scores are low ( $\leq 1$ ) because the target variables of the three links only have a single dynamic variable. Initially, the  $R_1$  loop score is very high, and then, between  $T_{13}$  and  $T_{14}$ , the  $B_1$  loop score starts to increase. “A loop (or set of loops) is dominant if the loop(s) describe at least 50% of the observed change in behaviour across all stocks in the model over the selected period” [46]. Therefore, over the selected period, the  $R_1$  loop is dominant because it covers more than 50% of the area during the selected run from  $T_1$  and  $T_{20}$ .
